# Supplementary material for: DNATCO: assignment of DNA conformers at dnatco.org
Source: PubMed Central journal article supplement — Nucleic Acids Res. 2016 May 5;44(Web Server issue):W284–7. doi: 10.1093/nar/gkw381 (PMC4987927; doi:10.1093/nar/gkw381), 2016-05-05
Supplement: supp_gkw381_nar-00377-web-b-2016-File004.pdf [file supp_gkw381_nar-00377-web-b-2016-File004.pdf]

Supplemental material to the manuscript

DNATCO: Assignment of DNA conformers at [dnatco.org](http://dnatco.org)

Jiří Černý, Paulína Božíková, and Bohdan Schneider \*

Institute of Biotechnology, CAS,  
Průmyslová 595, 252 50 Vestec, Prague West, Czech Republic

\* Corresponding author. email: [bohdan.schneider@gmail.com](mailto:bohdan.schneider@gmail.com)

## SUPPLEMENTARY DATA

**Figure S1.** The top part of the dnatco.org home page summarizes the purpose of the web service and defines the nomenclature of the dinucleotide step. The PDB formatted structure file can be uploaded either from user's disk or by typing a PDB four-letter code and pressing the respective SUBMIT button.

### Assignment of DNA conformers (DNATCO v2)

[Tutorial](#) [Test run \(PDB ID 1bna\)](#)

The server assigns 57 DNA conformers based on the values of their 9 backbone torsion angles.

- Table defining the conformers is below; definition of the conformers, their esd values and Cartesian coordinates of their representative samples can be [downloaded](#).
- Conformers are identified by four-letter symbols. "A", "B", "Z" letters imply stacked bases with first/second nucleotide in A, B, or Z like conformation. "NS" labels steps with Not Stacked bases. "S" at 3<sup>rd</sup> or 4<sup>th</sup> position means that the 1<sup>st</sup> or 2<sup>nd</sup> base is in *syn* orientation.
- Conformationally extreme conformers are not assigned to any of the above; these steps formally represent the S8<sup>th</sup> conformer.
- More information about the conformers and the ways how the conformers were identified will be published but the current assignment improves the conformers described in the paper by [Svozil et al., Nucleic Acids Research, 36, 3690 \(2008\)](#).

Please, read before you upload coordinates of your DNA:

- DNA steps are identified based on atom names as defined by the PDB format, version 3.1 or above (sugar atoms as O4' not O4\*).
- Contact the authors for off-line analysis of non-standard or large structures (multiple NMR MODELS or MD simulation trajectory).
- Steps with non-standard or missing atoms that define torsions  $\delta$ ,  $\delta+1$ ,  $\chi$ , and  $\chi+1$  are not considered in the assignment process.
- Conformers are assigned for modified residues that contain standard names for atoms defining the step torsions between  $\delta$  and  $\delta+1$  and  $\chi$  and  $\chi+1$ .

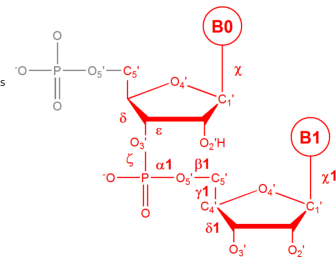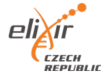

Browse for the PDB file

No file selected.

or

Enter PDB ID

**Table S1.** The table summarizes the names and brief annotations of the 57 ntC DNA conformers and their grouping into 12 classes of the ntA structural alphabet together with the values of their torsion angles. These are seven torsions defining the backbone conformation of the step from  $\delta$  of the first nucleotide to  $\delta$  of the second one (labeled  $\delta 1$ ), plus two torsion values around the glycosidic bonds of the first and second bases ( $\chi$  and  $\chi 1$ ). ntC are identified by four-letter symbols. The first letter aims to characterize the main feature(s) of the first nucleotide, the second of the second one. A, B, Z letters imply stacked bases with the first/second nucleotide in a conformation bearing features typical of the A, B, or Z DNA forms such as sugar pucker, torsion around the glycosidic bond, combination of torsions zeta and alpha and other torsions. The first two letters "NS" label steps with Not Stacked bases. Numbers at the third or fourth positions just guarantee the uniqueness of the ntC symbol, "S" at these positions means that the 1st or 2nd base is in the syn orientation. The last column "count" contains numbers of dinucleotide steps used for the definition of each ntC in the "golden set".

| ntA  | ntC                                                              | Annotation                                                                                                                                                                                                                              | $\delta$                                                                     | $\epsilon$ | $\zeta$ | $\alpha 1$ | $\beta 1$ | $\gamma 1$ | $\delta 1$ | $\chi$ | $\chi 1$ | count |    |
|------|------------------------------------------------------------------|-----------------------------------------------------------------------------------------------------------------------------------------------------------------------------------------------------------------------------------------|------------------------------------------------------------------------------|------------|---------|------------|-----------|------------|------------|--------|----------|-------|----|
| AAA  | AA00                                                             | The most frequent, "canonical" A-DNA (identical to A-RNA)                                                                                                                                                                               | 83                                                                           | 206        | 287     | 293        | 174       | 55         | 83         | 199    | 202      | 296   |    |
|      | AA01                                                             | A-DNA with $\alpha 1/\gamma 1$ crank (150/180)                                                                                                                                                                                          | 82                                                                           | 194        | 291     | 149        | 193       | 182        | 87         | 205    | 188      | 55    |    |
|      | AA02                                                             | A-DNA with BI-like $\chi/\chi 1$                                                                                                                                                                                                        | 88                                                                           | 203        | 275     | 294        | 161       | 54         | 88         | 244    | 245      | 168   |    |
| A-B  | AB01                                                             | A-to-B: $\delta$ C3'-endo, $\delta 1$ C2'-endo, $\chi/\chi 1$ have A/B pattern                                                                                                                                                          | 86                                                                           | 193        | 283     | 299        | 180       | 55         | 142        | 221    | 255      | 101   |    |
|      | AB02                                                             | A-to-B: $\delta$ -O4'-endo, extremely low $\epsilon$ , $\chi/\chi 1$ are B-like                                                                                                                                                         | 92                                                                           | 61         | 59      | 208        | 185       | 64         | 133        | 237    | 253      | 21    |    |
| B1A  | BA01                                                             | BI-to-A complex conformer with $\delta 1$ from C3' to O4'-endo, $\chi/\chi 1$ are B-like                                                                                                                                                | 135                                                                          | 188        | 253     | 303        | 159       | 53         | 87         | 258    | 225      | 20    |    |
|      | BA02                                                             |                                                                                                                                                                                                                                         | 122                                                                          | 185        | 271     | 279        | 186       | 48         | 89         | 233    | 238      | 9     |    |
|      | BA03                                                             |                                                                                                                                                                                                                                         | 130                                                                          | 194        | 263     | 282        | 178       | 48         | 89         | 238    | 236      | 15    |    |
|      | BA04                                                             |                                                                                                                                                                                                                                         | 137                                                                          | 190        | 258     | 296        | 165       | 54         | 90         | 249    | 226      | 16    |    |
|      | BA05                                                             |                                                                                                                                                                                                                                         | 128                                                                          | 183        | 257     | 297        | 169       | 52         | 97         | 243    | 222      | 14    |    |
|      | BA06                                                             |                                                                                                                                                                                                                                         | 129                                                                          | 185        | 267     | 296        | 170       | 53         | 101        | 249    | 236      | 86    |    |
|      | BA07                                                             |                                                                                                                                                                                                                                         | 137                                                                          | 181        | 271     | 289        | 177       | 53         | 107        | 256    | 242      | 19    |    |
|      | BA08                                                             |                                                                                                                                                                                                                                         | B-to-A: $\beta 1$ -120, $\chi 1$ A-like                                      | 141        | 212     | 188        | 302       | 129        | 55         | 85     | 271      | 211   | 12 |
|      | BA09                                                             |                                                                                                                                                                                                                                         | BI-to-A: $\beta 1$ -60, $\alpha 1/\gamma 1$ crank (250/170), $\chi 1$ A-like | 135        | 199     | 287        | 254       | 71         | 168        | 86     | 265      | 187   | 13 |
|      | BA10                                                             |                                                                                                                                                                                                                                         | 129                                                                          | 189        | 223     | 131        | 219       | 184        | 94         | 252    | 198      | 13    |    |
|      | BA11                                                             |                                                                                                                                                                                                                                         | B-to-A complex cluster: $\alpha 1$ -100, $\gamma 1$ -180, $\chi 1$ A-like    | 133        | 203     | 233        | 100       | 218        | 199        | 88     | 252      | 199   | 15 |
|      | BA12                                                             | 141                                                                                                                                                                                                                                     | 208                                                                          | 202        | 89      | 244        | 199       | 85         | 267        | 191    | 21       |       |    |
| B2A  | BA13                                                             | BII-to-A complex cluster: $\alpha 1$ -60, $\gamma 1$ -180, $\chi 1$ A-like                                                                                                                                                              | 142                                                                          | 224        | 191     | 80         | 237       | 196        | 92         | 271    | 197      | 20    |    |
|      | BA14                                                             |                                                                                                                                                                                                                                         | 143                                                                          | 230        | 209     | 69         | 231       | 204        | 87         | 262    | 200      | 23    |    |
|      | BA15                                                             |                                                                                                                                                                                                                                         | 142                                                                          | 240        | 187     | 75         | 227       | 189        | 88         | 267    | 201      | 19    |    |
|      | BA16                                                             |                                                                                                                                                                                                                                         | BII-to-A: $\chi 1$ A-like                                                    | 145        | 255     | 187        | 63        | 226        | 196        | 87     | 260      | 201   | 7  |
|      | BA17                                                             | BII-to-A: $\delta 1$ -O4'-endo, $\beta 1$ -120                                                                                                                                                                                          | 148                                                                          | 255        | 177     | 294        | 130       | 44         | 96         | 272    | 234      | 27    |    |
| BBB  | BB00                                                             | The most frequent DNA conformer, "canonical" B form, also called BI                                                                                                                                                                     | 138                                                                          | 183        | 259     | 303        | 180       | 44         | 138        | 252    | 258      | 1960  |    |
| 2B1  | BB01                                                             | Less populated variant of BI form                                                                                                                                                                                                       | 132                                                                          | 181        | 265     | 301        | 177       | 49         | 121        | 248    | 244      | 142   |    |
| 3B1  | BB02                                                             | BI with $\alpha 1/\gamma 1$ crank (30/300)                                                                                                                                                                                              | 140                                                                          | 194        | 246     | 32         | 194       | 297        | 150        | 252    | 253      | 134   |    |
|      | BB03                                                             | BI with $\alpha 1/\gamma 1$ crank (170/170)                                                                                                                                                                                             | 145                                                                          | 176        | 276     | 166        | 164       | 173        | 146        | 239    | 232      | 31    |    |
| B12  | BB04                                                             | BI-to-BII conformer                                                                                                                                                                                                                     | 140                                                                          | 201        | 214     | 315        | 153       | 46         | 140        | 263    | 253      | 244   |    |
|      | BB05                                                             | BI-to-BII with $\alpha 1/\gamma 1$ crank (70/230), $\chi 1$ A-like                                                                                                                                                                      | 143                                                                          | 214        | 217     | 57         | 229       | 237        | 119        | 272    | 216      | 8     |    |
|      | BB06                                                             |                                                                                                                                                                                                                                         | 143                                                                          | 223        | 193     | 73         | 233       | 212        | 126        | 265    | 205      | 14    |    |
| BB2  | BB07                                                             | BII form, typical by $\epsilon/\zeta$ switch compared to BI                                                                                                                                                                             | 144                                                                          | 245        | 171     | 297        | 141       | 46         | 141        | 270    | 259      | 371   |    |
|      | BB08                                                             | BII form, variant, $\alpha 1/\gamma 1$ crank (60/210)                                                                                                                                                                                   | 145                                                                          | 259        | 184     | 61         | 223       | 205        | 140        | 268    | 235      | 11    |    |
|      | BB09                                                             |                                                                                                                                                                                                                                         | 140                                                                          | 238        | 207     | 67         | 237       | 215        | 145        | 255    | 226      | 11    |    |
| miB  | BB10                                                             | B form with extremely low values of $\alpha 1$ , $\beta 1$ , $\gamma 1$                                                                                                                                                                 | 139                                                                          | 195        | 191     | 23         | 106       | 19         | 129        | 257    | 258      | 49    |    |
|      | BB11                                                             | B form with $\alpha 1/\gamma 1$ crank (120/180)                                                                                                                                                                                         | 144                                                                          | 200        | 199     | 121        | 226       | 189        | 143        | 258    | 222      | 22    |    |
|      | BB12                                                             | BI with $\alpha 1/\gamma 1$ crank (250/170), low $\beta 1$ 70, $\chi 1$ A-like                                                                                                                                                          | 140                                                                          | 196        | 287     | 248        | 73        | 172        | 144        | 263    | 212      | 18    |    |
|      | BB13                                                             | BI with $\alpha 1/\gamma 1$ crank (210/160), low $\beta 1$ 100, $\chi 1$ A-like                                                                                                                                                         | 143                                                                          | 186        | 291     | 216        | 104       | 161        | 147        | 252    | 219      | 17    |    |
|      | BB14                                                             | B-form with extremely low $\epsilon$                                                                                                                                                                                                    | 121                                                                          | 104        | 303     | 229        | 260       | 73         | 132        | 264    | 263      | 8     |    |
|      | BB15                                                             | BI with high $\alpha 1$ and $\gamma 1$ near 0                                                                                                                                                                                           | 149                                                                          | 187        | 261     | 341        | 192       | 354        | 148        | 250    | 261      | 18    |    |
|      | BB16                                                             | 144                                                                                                                                                                                                                                     | 215                                                                          | 301        | 278     | 180        | 42        | 144        | 194        | 281    | 11       |       |    |
|      | BB17                                                             | 141                                                                                                                                                                                                                                     | 249                                                                          | 288        | 287     | 155        | 47        | 137        | 201        | 286    | 13       |       |    |
|      | BB18                                                             | Complex cluster of B-like conformers: A-like $\chi$ , bases may be unstacked to incorporate intercalated drug, occurs where backbone accommodates deformation (metal ion near, strand crossing in Holliday junctions, ends of duplexes) | 147                                                                          | 226        | 274     | 286        | 168       | 53         | 145        | 199    | 278      | 30    |    |
|      | BB19                                                             | 145                                                                                                                                                                                                                                     | 218                                                                          | 274        | 295     | 182        | 55        | 142        | 191        | 245    | 38       |       |    |
|      | BB20                                                             | 142                                                                                                                                                                                                                                     | 233                                                                          | 295        | 294     | 165        | 50        | 139        | 188        | 257    | 7        |       |    |
| BB21 | 143                                                              | 237                                                                                                                                                                                                                                     | 283                                                                          | 283        | 173     | 47         | 143       | 207        | 276        | 18     |          |       |    |
| SQX  | AB1S                                                             | A-to-B-like but $\chi 1$ syn, mostly in duplexes                                                                                                                                                                                        | 91                                                                           | 214        | 280     | 295        | 176       | 56         | 139        | 238    | 67       | 14    |    |
|      | BBS1                                                             | BI-like but c syn, may be in duplex but many G-G in quadruplexes                                                                                                                                                                        | 146                                                                          | 189        | 275     | 294        | 174       | 52         | 135        | 62     | 261      | 47    |    |
|      | BB1S                                                             | G-G in quadruplexes, unusual $\beta 1$ , $\gamma 1$ , $\chi 1$ syn                                                                                                                                                                      | 140                                                                          | 202        | 282     | 307        | 258       | 304        | 151        | 236    | 65       | 17    |    |
|      | BB2S                                                             | BI-like but $\chi 1$ syn, mostly G-G in quadruplexes, $\alpha 1$ g+, $\gamma 1$ g-                                                                                                                                                      | 137                                                                          | 196        | 225     | 33         | 187       | 295        | 145        | 257    | 70       | 8     |    |
|      | NS1S                                                             | Partially unstacked T-G/G-T in quadruplexes, $\chi 1$ syn, unusual $\zeta$ , $\alpha 1$ , $\gamma 1$                                                                                                                                    | 143                                                                          | 206        | 61      | 82         | 204       | 192        | 146        | 242    | 68       | 13    |    |
|      | NS02                                                             | Start of loop in quadruplex or hairpin, G-X, untypical $\zeta$ , $\alpha 1$ , $\gamma 1$                                                                                                                                                | 145                                                                          | 225        | 67      | 74         | 189       | 191        | 137        | 264    | 258      | 14    |    |
|      | NS03                                                             | Partially unstacked T-T in quadruplexes, unusual combination of $\epsilon$ , $\zeta$ , $\alpha 1$ , $\gamma 1$ , $\chi 1$                                                                                                               | 143                                                                          | 294        | 111     | 153        | 197       | 53         | 151        | 262    | 185      | 13    |    |
|      | NS04                                                             | Unstacked, in 4-way junction, $\epsilon$ , $\zeta$ high values                                                                                                                                                                          | 140                                                                          | 275        | 279     | 304        | 191       | 56         | 150        | 266    | 210      | 12    |    |
| NS05 | 5'-end of dsDNA, base open (unstacked), $\zeta$ , $\alpha 1$ ~60 | 154                                                                                                                                                                                                                                     | 242                                                                          | 77         | 63      | 177        | 64        | 137        | 237        | 249    | 10       |       |    |
| ZZZ  | ZZ1S                                                             | Z form, Y-R step                                                                                                                                                                                                                        | 148                                                                          | 264        | 76      | 66         | 186       | 179        | 95         | 205    | 60       | 20    |    |
|      | ZZ2S                                                             | Z form, Y-R step, $\delta 1$ C2'-endo                                                                                                                                                                                                   | 141                                                                          | 263        | 71      | 78         | 179       | 185        | 148        | 208    | 77       | 41    |    |
|      | ZZS1                                                             | ZI form, R-Y step                                                                                                                                                                                                                       | 97                                                                           | 242        | 294     | 209        | 230       | 55         | 144        | 63     | 205      | 48    |    |
|      | ZZS2                                                             | ZII form, R-Y step                                                                                                                                                                                                                      | 95                                                                           | 186        | 63      | 169        | 162       | 44         | 144        | 58     | 213      | 17    |    |

**Table S2.** Estimated standard deviations of torsion averages for the 57 ntC DNA conformers defined in Table S1.

| ntA  | ntC  | esd $\delta$ | esd $\epsilon$ | esd $\zeta$ | esd $\alpha 1$ | esd $\beta 1$ | esd $\gamma 1$ | esd $\delta 1$ | esd $\chi$ | esd $\chi 1$ |
|------|------|--------------|----------------|-------------|----------------|---------------|----------------|----------------|------------|--------------|
| AAA  | AA00 | 4.8          | 7.7            | 5.9         | 6.2            | 8.0           | 6.1            | 4.4            | 7.3        | 6.9          |
|      | AA01 | 3.7          | 7.6            | 5.9         | 8.3            | 6.6           | 5.8            | 3.7            | 4.7        | 4.6          |
|      | AA02 | 5.9          | 8.9            | 9.9         | 6.9            | 8.2           | 4.9            | 5.5            | 7.8        | 7.4          |
| A-B  | AB01 | 3.8          | 12.7           | 7.9         | 7.8            | 8.6           | 6.0            | 4.4            | 11.8       | 8.6          |
|      | AB02 | 8.5          | 10.9           | 11.6        | 11.4           | 11.5          | 8.0            | 7.7            | 12.5       | 8.5          |
| B1A  | BA01 | 3.3          | 4.7            | 5.7         | 3.4            | 5.0           | 3.8            | 2.0            | 5.8        | 4.5          |
|      | BA02 | 5.4          | 6.1            | 6.2         | 4.1            | 4.2           | 5.1            | 6.7            | 4.3        | 3.3          |
|      | BA03 | 8.5          | 6.1            | 7.3         | 5.4            | 9.0           | 4.5            | 5.0            | 5.9        | 5.5          |
|      | BA04 | 3.8          | 2.7            | 4.0         | 4.9            | 3.3           | 3.3            | 3.7            | 3.9        | 4.8          |
|      | BA05 | 7.8          | 6.4            | 8.7         | 11.8           | 9.3           | 7.8            | 10.2           | 7.6        | 6.9          |
|      | BA06 | 8.1          | 7.4            | 5.8         | 6.2            | 4.8           | 5.4            | 7.9            | 8.2        | 6.2          |
|      | BA07 | 6.0          | 7.8            | 6.1         | 8.5            | 5.3           | 12.6           | 4.8            | 7.4        | 5.9          |
|      | BA08 | 6.6          | 6.8            | 4.9         | 4.8            | 6.0           | 5.8            | 5.5            | 5.5        | 3.1          |
|      | BA09 | 4.4          | 5.7            | 5.2         | 5.7            | 10.0          | 6.0            | 4.6            | 4.7        | 4.7          |
|      | BA10 | 12.1         | 7.8            | 11.5        | 8.4            | 6.8           | 7.9            | 6.6            | 9.1        | 6.1          |
|      | BA11 | 8.1          | 7.3            | 15.5        | 12.4           | 8.3           | 12.8           | 3.5            | 8.8        | 5.0          |
|      | BA12 | 9.3          | 6.9            | 14.8        | 7.0            | 9.6           | 7.5            | 6.9            | 13.4       | 4.8          |
| B2A  | BA13 | 5.5          | 10.6           | 7.6         | 9.3            | 8.2           | 8.1            | 7.8            | 9.6        | 6.3          |
|      | BA14 | 7.2          | 10.3           | 8.5         | 10.2           | 7.0           | 7.0            | 6.0            | 7.5        | 5.5          |
|      | BA15 | 6.0          | 7.9            | 7.0         | 7.9            | 6.1           | 8.4            | 6.4            | 8.7        | 8.3          |
|      | BA16 | 5.1          | 11.4           | 4.4         | 8.2            | 6.9           | 2.8            | 3.2            | 3.3        | 3.2          |
|      | BA17 | 8.1          | 8.6            | 10.1        | 9.5            | 9.0           | 7.4            | 7.8            | 9.4        | 8.1          |
| BBB  | BB00 | 5.8          | 9.3            | 10.2        | 9.2            | 10.5          | 6.0            | 5.1            | 9.0        | 9.9          |
| 2B1  | BB01 | 8.1          | 6.9            | 6.0         | 7.7            | 5.6           | 6.4            | 3.8            | 8.6        | 6.0          |
| 3B1  | BB02 | 5.6          | 7.0            | 7.8         | 8.8            | 14.2          | 8.5            | 4.8            | 8.9        | 9.3          |
|      | BB03 | 5.6          | 7.4            | 8.2         | 14.5           | 12.1          | 8.6            | 6.5            | 12.1       | 9.1          |
| B12  | BB04 | 4.4          | 9.6            | 9.1         | 8.0            | 9.0           | 6.5            | 4.5            | 8.9        | 8.7          |
|      | BB05 | 6.5          | 6.5            | 6.5         | 6.5            | 9.4           | 4.1            | 9.1            | 10.7       | 7.5          |
|      | BB06 | 5.8          | 7.5            | 7.7         | 7.4            | 7.0           | 4.7            | 7.4            | 9.9        | 7.7          |
| BB2  | BB07 | 5.1          | 12.3           | 9.6         | 8.8            | 7.6           | 6.0            | 5.5            | 9.7        | 11.2         |
|      | BB08 | 6.3          | 10.1           | 6.6         | 8.0            | 9.4           | 4.6            | 10.5           | 6.4        | 7.4          |
|      | BB09 | 8.7          | 6.6            | 8.1         | 6.6            | 7.0           | 7.4            | 8.0            | 7.5        | 8.2          |
| miB  | BB10 | 5.2          | 10.3           | 9.2         | 11.4           | 9.0           | 9.6            | 7.5            | 10.3       | 9.6          |
|      | BB11 | 6.2          | 9.6            | 9.0         | 12.5           | 11.3          | 10.2           | 7.0            | 10.0       | 9.9          |
|      | BB12 | 4.6          | 6.0            | 11.7        | 13.7           | 3.8           | 4.2            | 4.4            | 8.0        | 9.0          |
|      | BB13 | 7.3          | 7.9            | 11.4        | 9.4            | 10.5          | 7.0            | 7.9            | 7.9        | 7.5          |
|      | BB14 | 6.0          | 6.8            | 5.6         | 7.2            | 4.2           | 8.6            | 4.6            | 8.7        | 5.9          |
|      | BB15 | 4.8          | 6.4            | 10.4        | 10.4           | 11.6          | 12.5           | 5.2            | 10.7       | 7.6          |
|      | BB16 | 5.0          | 7.4            | 8.4         | 6.8            | 6.9           | 6.2            | 5.8            | 7.6        | 10.9         |
|      | BB17 | 4.7          | 6.6            | 5.1         | 4.8            | 5.1           | 6.9            | 3.8            | 6.6        | 7.5          |
|      | BB18 | 7.0          | 5.5            | 6.7         | 6.3            | 5.4           | 5.4            | 4.6            | 6.1        | 7.9          |
|      | BB19 | 8.1          | 8.8            | 5.5         | 6.8            | 5.6           | 8.3            | 4.7            | 9.0        | 8.1          |
|      | BB20 | 8.7          | 5.2            | 6.7         | 10.0           | 9.0           | 4.9            | 6.7            | 6.6        | 11.0         |
| BB21 | 7.9  | 7.1          | 5.9            | 7.4         | 6.7            | 6.7           | 4.2            | 5.3            | 8.0        |              |
| SQX  | AB1S | 2.4          | 3.3            | 4.4         | 4.6            | 4.4           | 3.6            | 4.9            | 4.2        | 3.7          |
|      | BBS1 | 5.1          | 8.7            | 7.7         | 9.6            | 6.9           | 7.7            | 6.8            | 9.4        | 10.8         |
|      | BB1S | 6.6          | 9.3            | 6.8         | 5.6            | 6.7           | 4.9            | 3.5            | 12.7       | 3.9          |
|      | BB2S | 2.6          | 3.1            | 2.3         | 6.4            | 3.7           | 3.1            | 1.9            | 4.8        | 2.6          |
|      | NS1S | 2.5          | 6.3            | 7.0         | 7.9            | 6.0           | 6.1            | 4.8            | 4.5        | 4.7          |
|      | NS02 | 2.8          | 9.3            | 6.6         | 12.1           | 7.9           | 7.7            | 9.1            | 12.5       | 8.3          |
|      | NS03 | 3.2          | 3.9            | 6.2         | 8.5            | 4.7           | 6.4            | 4.4            | 5.9        | 2.3          |
|      | NS04 | 3.5          | 6.2            | 7.3         | 9.3            | 7.9           | 7.1            | 2.6            | 6.4        | 3.9          |
| NS05 | 2.1  | 2.0          | 4.0            | 5.3         | 2.2            | 4.2           | 1.3            | 4.7            | 3.1        |              |
| ZZZ  | ZZ1S | 3.5          | 5.3            | 4.0         | 3.8            | 4.4           | 3.5            | 5.0            | 5.5        | 6.1          |
|      | ZZ2S | 4.5          | 5.5            | 6.2         | 7.0            | 6.7           | 4.7            | 6.6            | 6.8        | 4.7          |
|      | ZZS1 | 5.8          | 7.2            | 8.7         | 6.9            | 10.1          | 5.8            | 4.9            | 4.9        | 6.4          |
|      | ZZS2 | 2.0          | 5.6            | 6.4         | 6.0            | 6.6           | 5.1            | 2.9            | 4.3        | 4.6          |
